## RESEARCH ARTICLE

# Sky radiance and spectral gradient are orienting cues for the sandhopper *Talitrus saltator* (Crustacea, Amphipoda)

Alice Ciofini<sup>1</sup>, Luca Mercatelli<sup>2</sup>, Takahiko Hariyama<sup>3</sup> and Alberto Ugolini<sup>1,\*</sup>

## ABSTRACT

The sandhopper *Talitrus saltator* relies on both the sun and the moon compasses to return to the belt of damp sand on the beach in which it lives buried during the day. In addition to the sun, the gradient of radiance and the spectral distribution across the sky could provide directional information that *T. saltator* can potentially use to orient itself during the day even when the sun is not visible (e.g. cloudy sky). The scope of this work was (1) to determine the intensity levels of sky radiance that the sandhoppers use in their zonal recovery and (2) to investigate whether this species relies on the celestial spectral gradient in its zonal recovery. Sandhoppers were tested in the laboratory under artificial radiance or spectral gradients. Our results show that under an artificial sky simulating the natural radiance gradient on a cloudless day, sandhoppers orientated toward the correct seaward direction of their home beach; however, individuals lost their ability to use the intensity gradient as an orientation cue when the radiance was attenuated by at least 40%. Sandhoppers were also able to head in the correct seaward direction of their home beach at any time of the day by using the spectral gradient as their only source of visual orientation reference.

**KEY WORDS:** Sky radiance, Spectral gradient, Orientation, Sandhopper, *Talitrus saltator*

## INTRODUCTION

The supralittoral sandhopper *Talitrus saltator* (Montagu 1808) is one of the best-known arthropod models for behavioural studies on celestial orientation. To return to the belt of damp sand by the sea, where it lives buried during the day, this species can rely on both the sun and the moon as cues for compass orientation (Papi and Pardi, 1953; Pardi and Papi, 1953; Pardi and Ercolini, 1986; Ugolini et al., 1999a,b). However, the sun and moon are not the only celestial cues used by this species. Beside astronomical cues, sandhoppers can use local cues, such as the slope of the substratum and the vision of the landscape as references to return to their belt of damp sand (Ercolini and Scapini, 1974; Craig, 1973; Hartwick, 1976; Ugolini et al., 1986, 2006; Ugolini, 2014; Ugolini and Ciofini, 2016). In addition to the sun, sunlight scattering on atmospheric particles generates additional skylight cues, such as a polarization pattern as well as profiles of radiance and spectral distributions (e.g. see Rossel and Wehner, 1984; Wehner, 1989, 1997; see also Horváth and Varjú,

2004; Cronin et al., 2014, for reviews). The pattern of skylight polarization provides directional information concordant with that provided by the sun, and helps many arthropods to orient themselves during the day even when the sun is not directly visible (e.g. under cloudy sky conditions) (see Waterman, 1981; Horváth and Varjú, 2004; Cronin et al., 2014, for reviews). Although the celestial polarization pattern serves as a reliable orienting reference for many arthropods, sandhoppers do not seem to use it as a compass cue in their zonal recovery (Ugolini et al., 2013).

Only *T. saltator* and the dung beetle *Scarabaeus lamarcki* are known to be able to obtain compass information from the skylight radiance gradient (Ugolini et al., 2009, 2012; el Jundi et al., 2014a). Even though these two species face different ecological problems, they are both under pressure to orientate in the most efficient way: *T. saltator* must return to the damp belt of sand as quickly as possible by a type of chronometric orientation defined as unidirectional not-vector orientation to avoid death due to dehydration. In contrast, *S. lamarcki* needs to maintain a straight route while rolling its ball away from a dung pile in a randomly chosen compass direction to avoid intraspecific competition (e.g. Dacke et al., 2013, 2014; Khaldy et al., 2019).

Although the use of the skylight radiance gradient as an orientation cue was first described in various species of animals, including *T. saltator*, by Verheijen (1978), since then only a few investigations have been conducted to study its role in orientation in arthropods (Wehner, 1997; Ugolini et al., 2009; el Jundi et al., 2014a). In insects, the relevance of the skylight radiance as a compass reference seems to be relatively low and used only in combination with other cues. For instance, the orienting system of the desert ant *Cataglyphis bicolor* is disrupted when it is allowed to orientate using only this cue (individuals lose their ability to maintain a correct homeward direction but perform phototactic responses toward the solar hemidome instead; Wehner, 1997). The dung beetle *S. lamarcki* (probably not performing time-compensated orientation) can orientate with high precision only by using intensity information in combination with additional skylight cues, such as skylight polarization (el Jundi et al., 2014a).

Although sandhoppers use the skylight radiance gradient for orientation (Ugolini et al., 2009), how the degree of cloudiness of the sky affects this ability has never been tested. An additional celestial cue used by some insects to achieve directional information is the spectral gradient. This is characterized by the predominance of longer (460–700 nm) wavelengths in the celestial hemicycle including the sun ('solar' hemidome) and shorter (293–460 nm) wavelengths in the opposite, 'antisolar' hemidome (Coemans et al., 1994). Some arthropods, like the honey bee *Apis mellifera* (Brines and Gould, 1979; Edrich et al., 1979; Rossel and Wehner, 1984), the desert ant *C. bicolor* (Wehner, 1997) and the dung beetle *S. lamarcki* (el Jundi et al., 2015b, 2016), are known to be able to discriminate between the solar and the antisolar direction based on

<sup>1</sup>Dipartimento di Biologia, Università di Firenze, Via Romana 17/19, 50125 Firenze, Italy.

<sup>2</sup>Istituto Nazionale di Ottica - CNR, Largo Enrico Fermi 6, 50125 Firenze, Italy.

<sup>3</sup>Institute for NanoSuit Research, Preeminent Medical Photonics Education and Research Center, Hamamatsu University, School of Medicine, Hamamatsu, 431-3192, Japan.

\*Author for correspondence (alberto.ugolini@unifi.it)

 A.U., 0000-0002-5041-7117

spectral information and to use them for spatial orientation. Interestingly, it has been demonstrated (Ugolini et al., 2010) that *T. saltator* perceives UV–blue (390–450 nm) and green (500–550 nm) wavelengths, which opens up the possibility that these animals may also derive compass information from the spectral pattern of the sky. The aim of this work was therefore to evaluate the ability of *T. saltator* (1) to detect and use skylight radiance profiles attenuated with respect to that occurring in conditions of clear sky and (2) to investigate the use of the celestial spectral gradient in its zonal recovery.

## MATERIALS AND METHODS

Adult individuals of *T. saltator* were collected in spring–summer 2013–2017 on a sandy beach in the Natural Park of Migliarino, San Rossore, Massaciuccoli (Pisa, Italy, 43°40′03″N, 10°20′29″E, sea–land axis 265–85 deg). Tests were conducted within 2 weeks of collection. In the laboratory, animals were kept in Plexiglas boxes containing wet sand at room temperature (25°C), under a light:dark cycle of 12 h:12 h in phase with the natural photoperiod. Food (universal dried food for fish, SERA® Vipan, Heinsberg, Germany) was constantly available.

We tested groups of 10–12 individuals within one trial, as it has been shown that the directional choice of individual sandhoppers is not influenced by the heading directions of their conspecifics (Scapini et al., 1981). At the end of the experiments, the sandhoppers were released at the collection site.

### Artificial radiance gradients

We performed experiments to test the use of radiance gradients and spectral gradients, releasing sandhoppers under artificial light conditions. To increase the motivation to rapidly orientate seaward, the animals were dehydrated for 2–3 min before the experiments. The sandhoppers were released at the centre of a transparent Plexiglas bowl (diameter 18 cm) placed on a horizontal transparent plate (diameter 30 cm) at local noon (Fig. 1A). The sandhoppers can jump or walk, slipping, trying to climb the wall of the bowl. A single direction for each radially oriented individual (with the head pointed toward the outside of the bowl and the longitudinal axis of the body oriented no more than  $\pm 45$  deg from the radius of the bowl) was recorded after 2 min from each release from freeze-framed images taken by a camera placed below the bowl. Sandhoppers belonging to each group were released only

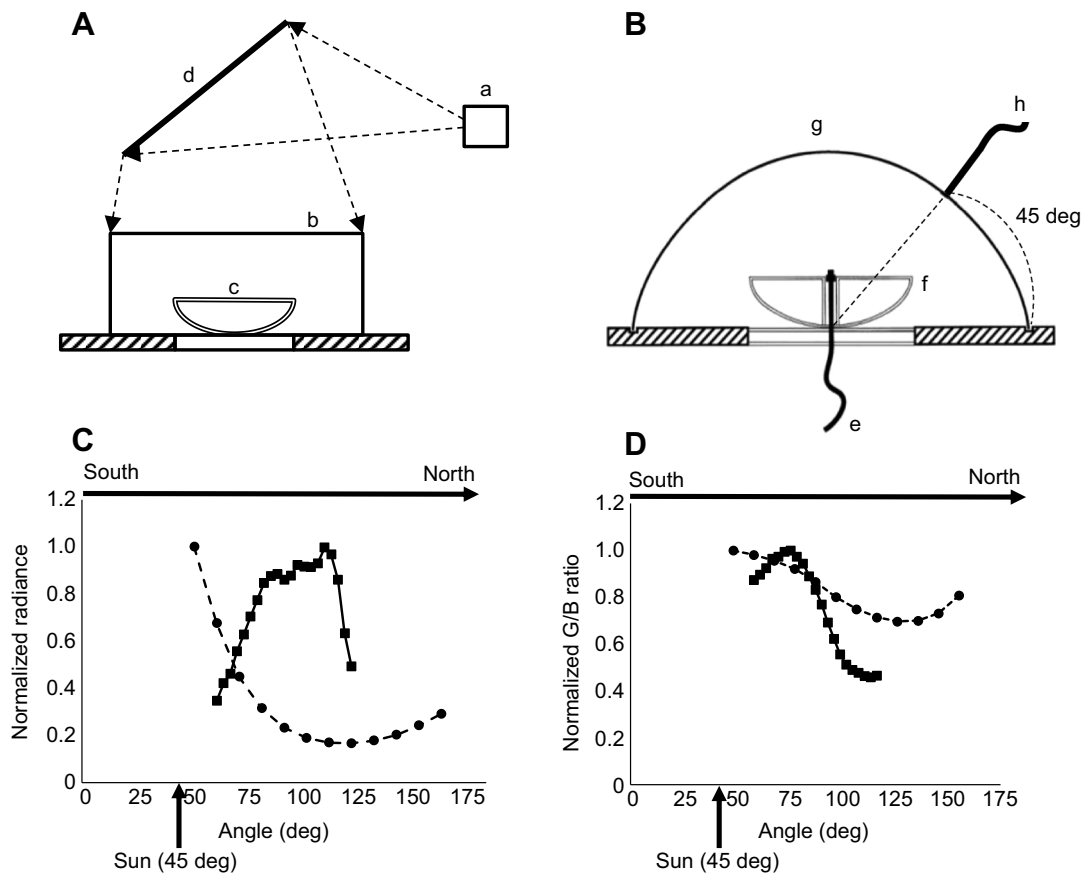

**Fig. 1. Experimental setup and spectroradiometric characterization of artificial and natural sky.** (A) Schematic representation of the device used in experiments with artificial radiance gradients. The image of artificial sky is projected by a video projector (a) via a mirror placed at 45 deg (d) onto a circular opaline Plexiglas plate (b) placed over the bowl containing the animals (c). (B) Schematic representation of the device used in the tests with an artificial spectral gradient. A fibre-optic illuminator (e) is inserted through a tube in the bowl containing sandhoppers (f) to light the internal surface of the Plexiglas opaline dome (g); a second fibre-optic guide mounted on the outside of the dome (h) simulates the sun (45 deg elevation). A video camera was placed under the bowl to record freeze-framed images. (C) Radiance recorded under the dome (B) in artificial (squares and solid line) and natural conditions of clear sky (circles and dashed line) as a function of the angle along the solar meridian. (D) Ratio between green and blue stimulation (G/B) as a function of the angle (from south to north) in the dome (artificial conditions, squares and solid line) and natural conditions (circles and dashed line) along the solar meridian. The black arrows above C and D indicate the direction from south to north of the measurements along the solar meridian. The sun elevation is shown on the x-axis (see B). In the solar hemidome, there is more green, while in the opposite hemidome, there is more blue. The natural and artificial conditions have a similar shape.

once. A goniometer was set below the bowl to measure the directions taken by the individuals with respect to 0 deg (north). The bowl was surrounded by an opaline Plexiglas cylinder (diameter 30 cm) closed at the top by an opaline Plexiglas plate (Fig. 1A). The artificial sky was projected (once reflected by a mirror) onto the circular opaline Plexiglas plate placed over the bowl, using a video-projector provided with a 200 W halogen lamp (LC4341, Philips).

The artificial radiance gradients were characterized through radiometric measurements performed at intervals of 5 deg along the solar meridian (zenithal distance of the sun, 45 deg). The spectroradiometer (AvaSpec-2048, Avantes BV, Apeldoorn, The Netherlands) was mounted on a stand and placed in the position where the animals started their orientation behaviour during the experiments. The spectral radiance ( $\text{W m}^{-2} \text{sr}^{-1} \text{nm}^{-1}$ ) and spectral patterns were measured for both the real sky and our artificial

environment (Fig. 1C,D). The radiance perceived by *T. saltator*,  $R_p$ , was calculated by weighting the recorded measurements,  $R(\lambda)$ , by the spectral sensitivity measured by electroretinogram (ERG) of the sandhoppers,  $S(\lambda)$  (Ugolini et al., 2010):

$$R_p = \int_{300 \text{ nm}}^{650 \text{ nm}} R(\lambda) \cdot S(\lambda) d\lambda. \quad (1)$$

The same method was used to evaluate the amount of light perceived by UV-blue and green photoreceptors (Ugolini et al., 2010), substituting green sensitivity,  $G_s(\lambda)$ , or blue sensitivity,  $B_s(\lambda)$ , of the absorption curves of each visual pigment calculated for each peak measured by ERG for  $S(\lambda)$  in Eqn 1. The images simulating the natural skylight radiance gradient under a clear sky (Fig. 2A) and with lower radiance gradients (Fig. 2D,G) were designed using the software

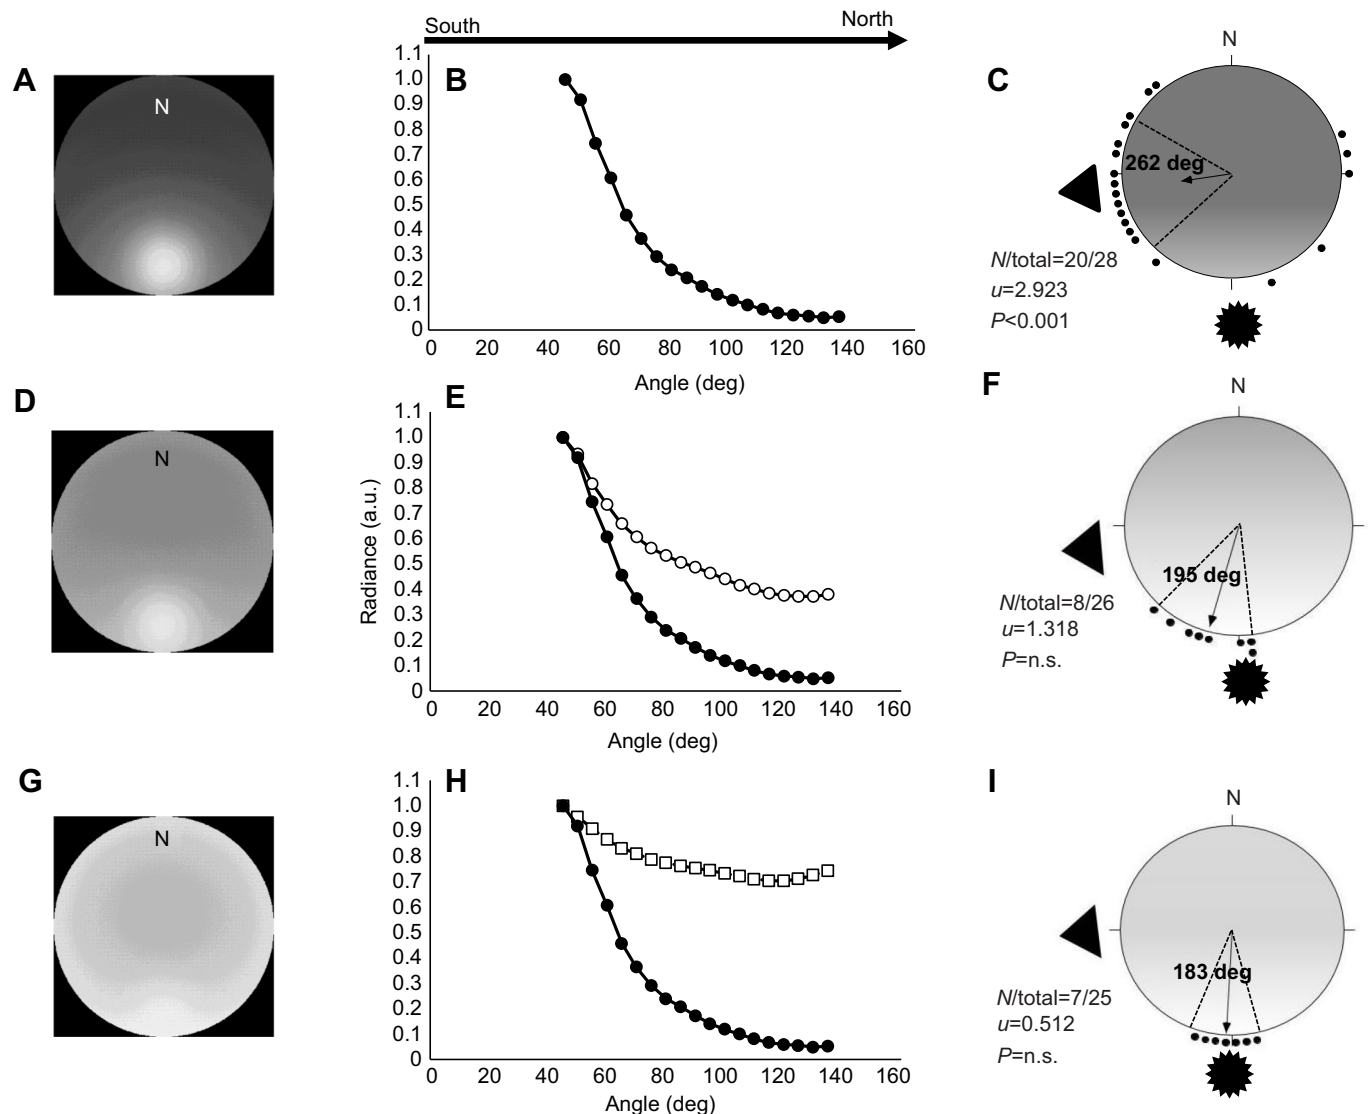

**Fig. 2. Artificial radiance gradient experiments.** Images of radiance gradients (A,D,G) and relative profile (B,E,H) as a function of the angle along the solar meridian (the black arrow above B indicates the direction from south to north of the measurements along the solar meridian). Three artificial gradient images were created: A, reproducing the natural gradient; D and G, gradients attenuated by 40% and 75%, respectively. (C,F,I) Circular distributions corresponding to the different gradients. N, north. Black arrows inside the distributions indicate the mean vector and angle (the length of the mean vector ranges from 0 to 1, i.e. the radius of the circle); the two dashed lines represent the confidence limits for the mean angle (95%). Black dots indicate the sandhoppers' directions (each dot corresponds to the direction of one individual); black triangles outside the distributions indicate the seaward direction of their home beach. The black sun symbol indicates the solar azimuth at the time of release even though the sun is not visible.  $N/\text{total}$ , number of radially orientated sandhoppers out of the total number of individuals tested. The values of the V-test,  $u$ , with their probability level,  $P$ , are also given (n.s., not significant).

MATLAB® (MATrix LABoratory). The images (Fig. 2D,G) were obtained by assigning a grey value to each numerical value of light radiance measured along the solar meridian under natural conditions.

In addition, we designed images attenuated to the gradient present in natural conditions of clear sky by reducing light radiance variation along the solar meridian. In particular, we elaborated patterns attenuated by 40% (Fig. 2D,E) and 75% (Fig. 2G,H).

### Artificial spectral gradient

Sandhoppers were released in a confined environment using the device described previously (see Ugolini et al., 1998, 2005). A white opaline Plexiglas dome (diameter 80 cm) was placed on top of the bowl. The internal surface of the dome (the artificial sky) was illuminated by a fibre-optic illuminator (Schott KL1500). The end of the light guide (diameter 8 mm) was accurately placed in a tube at the centre of the bowl (Fig. 1B) which allowed presentation of a wide stimulus across the inner surface of the dome (dome illumination). The end of a second light guide (diameter 4.5 mm) was mounted at the outer surface of the dome at an elevation of 45 deg and allowed presentation of a light spot to the animals (simulated sun). Tests were carried out with and without the simulated sun switched on (Fig. 1B). Some releases were carried out with the only the dome illuminated (i.e. with the simulated sun switched off) to exclude any possible use of additional orientation cues, such as the Earth's magnetic field. Artificial celestial blue profiles were reproduced by positioning a blue gelatine filter (no. 118 Light Blue,  $\lambda_{\max}$ =450 nm, transmittance=22.16%, SpotLight, Milan, Italy) on the half of the tip of the fibre light guide illuminating the dome. To exclude the possible use of intensity information as orientation cues (radiance gradient), differences in light radiance between the two halves of the dome were reduced by placing two neutral density filters (no. 298, transmittance=69.3% and no. 209, transmittance=51.2%, Illuminoservice, Bologna, Italy) on the other half of the tip of the fibre, superimposed. This arrangement produced a spectral gradient across the dome's inner surface but not any absolute intensity differences: thus, the only orientating cue could be a spectral gradient across the artificial sky. To compare the artificial spectral gradient with the natural one, disregarding the natural radiance gradient, spectra achieved with outdoor measurement of the open sky were normalized to the light radiance pattern and elaborated according to blue and green sensitivity as explained below. The experiments with the spectral gradient stimulus were carried out in the morning, around noon, and in the afternoon. Thus, if the sandhoppers use spectral information as an orientation cue, they should orientate toward the blue-rich hemisphere in the morning, along the theoretical separation line between the two hemidomes at noon, and away from the blue-rich hemisphere in the afternoon. Prior to each experiment, the position of the blue filter and the azimuth of the simulated sun were adjusted according to the azimuthal position of the 'real' sun at the respective time of day (Fig. 3B–D).

Fig. 1C shows the artificial radiance profile recorded with respect to the natural one measured under clear sky conditions. The curve is relatively flat in the range of about 70–100 deg (it varies by about 20%) compared with the natural one: this radiance difference (20%) is too weak to serve as a compass cue for the sandhoppers (see Fig. 2E,F,H,I: a difference of about 40% and 75% is not sufficient to allow compass information with respect to the radiance gradient). The flat radiance profile in the artificial environment is crucial for the evaluation of the sandhoppers' response to differences in sky spectral characteristics. To compare the colour (as perceived by sandhoppers) of the two halves of the artificial sky, we must balance

the part of the spectrum, of each half, that falls in the blue sensitivity and the one which falls in the green sensitivity of *T. saltator* under a constant sky radiance.

If we consider a constant-radiance sky, from the point of view of a sandhopper, the blue-rich hemidome is much brighter than the green-rich hemidome both in nature and under our artificial spectral gradient. To consider this, we calculated the green/blue ratio (G/B) (Fig. 1D). The curves for the G/B ratio measured in nature and under our artificially generated spectral gradient show a similar shape with relatively more green light in the solar hemidome and relatively more blue light in the antisolar hemidome. Also, in this case, natural measurements were normalized in order to obtain a constant radiance.

### Statistical analysis

Data were analysed following the methods proposed by Batschelet (1981) for circular distributions. For each distribution, the length of the mean resultant vector and the mean angle were calculated. We used the *V*-test to establish whether distributions differed from uniformity ( $P<0.05$  at least) (Aneshansley and Larkin, 1981). The confidential limits for the mean angles (95% confidence; Batschelet, 1981) were calculated to assess the orientation towards the seaward (expected) direction. Comparisons among the number of radially orientated sandhoppers were made by the *G*-test (Zar, 1984).

## RESULTS

### Artificial radiance gradients

Sandhoppers tested around local noon, under the artificial radiance gradient corresponding to the profile of the clear natural sky, orientated significantly toward the seaward direction of their home beach. The mean resultant vector was deflected from the expected direction by only 23 deg (Fig. 2C).

When the sandhoppers' orientation behaviour was tested under weaker radiance gradients, attenuated by 40% (Fig. 2D–F) or 75% (Fig. 2G–I), individuals did not exhibit directional choices in accordance with the expected direction; in both cases, they showed a positive phototactic orientation behaviour toward the solar hemidome (Fig. 2F,I).

The number of the radially orientated sandhoppers out of the total number of individuals released was significantly higher in tests performed under the non-attenuated artificial gradient of radiance (corresponding to natural radiance) than in tests carried out under attenuated gradients (Fig. 4A,  $G=13.100$ , d.f.=2,  $P<0.01$ , *G*-test).

### Artificial spectral gradient

In the control experiment (Fig. 3A) under an illuminated dome that did not provide any visual cue as an orientation reference (i.e. a simulated sun or intensity radiance or spectral gradient), the sandhoppers were not statistically orientated (the distribution was not statistically dissimilar from uniformity). Thus, only 27% ( $N=8/30$ ) of the released individuals were radially orientated ( $G=6.683$ , d.f.=1,  $P<0.01$ , *G*-test).

Sandhoppers tested under the artificial spectral gradient, combined with a simulated sun that was switched on were significantly orientated. Irrespective of the time of day tested, the mean directions were in agreement with the seaward direction of their home beach (Fig. 3B–D), deviating about 2–10 deg from the expected direction. In addition, most of the sandhoppers (80%,  $N=210$ ) made a clear directional choice (Fig. 4B, white bars): the ratio of orientated animals released at noon and afternoon was about 95% and 94%, respectively. However, only about 50% of the sandhoppers released in the morning were radially orientated.



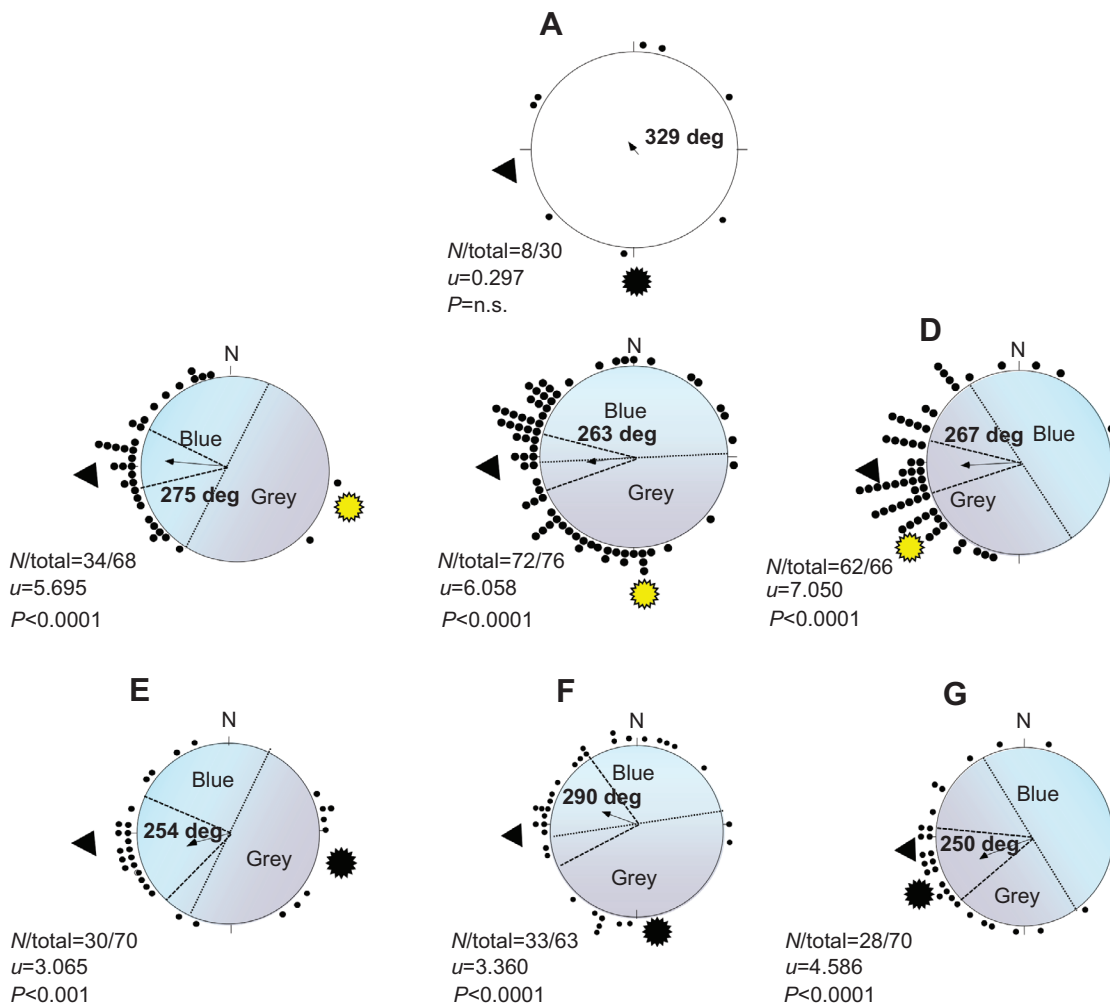

**Fig. 3. Artificial spectral gradient experiments.** (A) Control test, with the artificial sun switched off and no gradient. (B–G) Tests carried out at three different times of the day with an artificial spectral gradient. B–D show tests with the artificial sun switched on; E–G show tests with the artificial sun switched off. The position of the artificial blue–grey spectral gradient varies in accordance with the solar azimuth (sun symbol outside the distributions). For further explanation, see Fig. 2.

In experiments carried out under the artificial spectral gradient without the simulated sun being on (Fig. 3E–G), the sandhoppers kept mean directions in good agreement with the expected seaward direction at any time of the day: the deviation of the mean direction from the expected direction was 11 deg in the test performed in the morning, 25 deg at noon and 15 deg in the experiment conducted in the afternoon (Fig. 3E–G). In all cases, the ratio of orientated animals was about 45% out of the total number of individuals released ( $n=203$ , Fig. 4B, black bars).

In the noon and afternoon releases, the frequency of radially orientated individuals was significantly higher in the test conducted with the simulated sun switched on with respect to those carried out in conditions with it switched off (noon tests:  $G=31.192$ , d.f.=1,  $P<0.001$ ; afternoon tests:  $G=41.779$ , d.f.=1,  $P<0.001$ ,  $G$ -test). This was not the case in the morning, where the proportion of orientated animals was similar irrespective of whether the spectral gradient stimulus was presented with the simulated sun switched on or off ( $G=0.450$ , d.f.=1,  $P$ -value not significant,  $G$ -test).

## DISCUSSION

Our results confirm the use of the skylight radiance gradient as a compass cue in the zonal orientation of *T. saltator*. Sandhoppers

released under the artificial radiance gradient that matched the natural intensity gradient on a cloudless day orientated correctly toward the seaward direction of their home beach (Fig. 2A–C). In contrast, they lost their ability to use this celestial cue as an orientation reference when released under artificial radiance profiles that exhibited a weaker intensity gradient than the natural gradient (Fig. 2D–I). The significant reduction of the proportion of radially orientated sandhoppers further confirmed the inability of the sandhoppers to orientate according to attenuated radiance patterns (Fig. 4A). Indeed, as previously stated, a skylight radiance gradient could be used by *T. saltator* to orientate along the sea–land axis of the beach even when the sun is not directly visible (Ugolini et al., 2009, 2012). We hypothesize that in natural conditions this can occur in the presence of fog or cloud cover in the sky, the spectral gradient being absent or very reduced.

The results obtained in experiments carried out under the artificial spectral gradient (Fig. 3) represent the first evidence on the use of the celestial spectral gradient as a compass cue in *T. saltator*. In fact, sandhoppers performed time-compensated directional choices and kept the correct seaward directions of their home beach independent of the time of release. The uniform distribution obtained by releasing sandhoppers with only the dome illuminated, in the absence of the

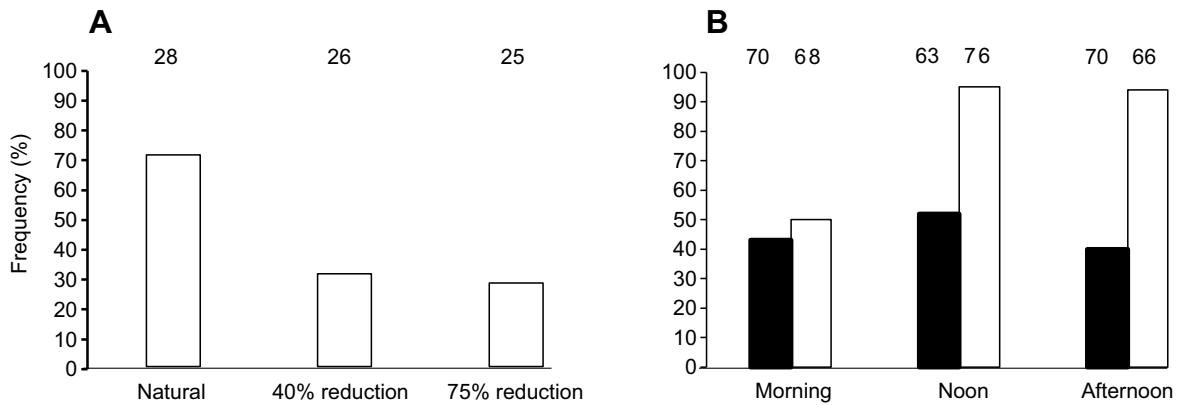

**Fig. 4. Frequency of radially orientated sandhoppers.** (A) Tests carried out under artificial gradients of radiance corresponding to natural radiance, and radiance reduced by 40% or 75%. (B) Tests with an artificial spectral gradient. White bars, sandhopper frequency recorded with the artificial sun on at three different times of the day; black bars, sandhopper frequency recorded with the artificial sun off. The numbers above the bars indicate the total number of sandhoppers tested.

simulated sun and radiance and/or spectral gradients (Fig. 3A), demonstrates that *T. saltator* does not use the natural magnetic field as a compass reference under these conditions at least.

It is important to note that the spectral gradient was the only available cue in the experiments where the simulated sun was switched off. Thus, the reduction of the number of radially orientated individuals could be caused by the absence of any further reliable cues, such as the substrate slope and the surrounding landscape (Ercolini and Scapini, 1974; Craig, 1973; Hartwick, 1976; Ugolini et al., 1986, 2006; Ugolini, 2014; Ugolini and Ciofini, 2016). It remains an open question why the sandhoppers exhibited a relatively low number of radially oriented individuals (50%) registered from the morning releases with the artificial sun switched on (Fig. 4B), which was not statistically different from the frequency registered in the morning releases with the artificial sun switched off (43%). We hypothesize that it could be due to the conflict between the use of the sun compass and a positive phototactic tendency: in fact, in contrast to the other test conditions, in the morning, the azimuth of the sun (105–110 deg) and the seaward direction (265 deg) are almost in opposite directions.

Based on ethological and neuroanatomical investigations, it is known that the polarization pattern is detected by a specialized region of the compound eye (Labhart and Meyer, 1999), while the main retina perceives the spectral and intensity information of the sky in insects (el Jundi et al., 2014b). Information provided by these skylight references is then integrated into the same network in the central nervous system to generate a consistent compass signal (Brines and Gould, 1979; Edrich et al., 1979; Rossel and Wehner, 1984; Wehner, 1989; el Jundi et al., 2014b, 2015a,b, 2019). Previous investigations (Pardi and Papi, 1953; Ugolini et al., 2013) revealed that *T. saltator* perceives the skylight polarization but it does not use the pattern of skylight polarization as a compass reference. Moreover, it is not yet clear what advantage there is for the sandhoppers to perceive wavelengths in the UV–blue range.

As hypothesized by Coemans et al. (1994), it is possible to speculate that the UV sensitivity is part of a colour-processing system well adapted to derive the position of the sun from the use of skylight spectral contrast. According to this hypothesis, we reasoned that the ability of *T. saltator* to detect light in the UV range may be ecologically advantageous in that it renders its overall compass system more reliable. However, *T. saltator* perceives UV–blue wavelengths mainly with the lower part of the eye, while the upper part presents photopigments both for UV–blue and for green

wavelengths (Ciofini et al., 2020). Therefore, we can imagine that the radiance and spectral gradients are perceived with the upper (dorsal) part of the eye while the UV–blue sensitivity of the lower part is more related to the identification of the sea hemicycle, given the importance of the perception of the coloured landscape (Ugolini et al., 2006), and not only of the contrast between the sea and land hemicycle in the zonal recovery of *T. saltator*.

#### Acknowledgements

Some of the results represented in Fig. 2 of this paper are reproduced, modified, from the PhD thesis of A. Ciofini (Ciofini, 2018). We wish to thank the Ente Parco Naturale Regionale Migliarino S. Rossore Massaciucoli (Pisa) for permission to collect the sandhoppers. Many thanks are also due to Dr el Jundi (Würzburg University) for critical reading of a draft version of our paper.

#### Competing interests

The authors declare no competing or financial interests.

#### Author contributions

Conceptualization: A.C., L.M., T.H., A.U.; Methodology: A.C., L.M., T.H., A.U.; Formal analysis: A.C., L.M., T.H., A.U.; Investigation: A.C., L.M., T.H., A.U.; Writing - original draft: L.M., T.H., A.U.; Writing - review & editing: L.M., T.H., A.U.; Supervision: A.U.; Project administration: A.U.

#### Funding

Funding was provided by the University of Florence (UniFi RICATEN 2018-2019, ex-60%) assigned to A. Ugolini.

#### References

- Aneshansley, D. J. and Larkin, T. S. (1981). V-test is not a statistical test of 'homeward' direction. *Nature* **293**, 239. doi:10.1038/293239a0
- Batschelet, E. (1981). *Circular Statistics in Biology*. London: Academic Press.
- Brines, M. L. and Gould, J. L. (1979). Bees have rules. *Science* **206**, 571-573. doi:10.1126/science.206.4418.571
- Ciofini, A. (2018). Interactions among celestial orienting factors and their functioning in supralittoral crustaceans. PhD thesis, Università di Firenze.
- Ciofini, A., Yamahama, Y., Mercatelli, L., Hariyama, T. and Ugolini, A. (2020). Specializations in the compound eye of *Talitrus saltator* (Crustacea, Amphipoda). *J. Comp. Physiol. A* **206**, 711-723. doi:10.1007/s00359-020-01432-8
- Coemans, M. A. J. M., Vos Hzn, J. J. and Nuboer, J. F. W. (1994). The relation between celestial colour gradients and the position of the sun, with regard to the sun compass. *Vision Res.* **34**, 1461-1470. doi:10.1016/0042-6989(94)90148-1
- Craig, P. C. (1973). Behaviour and distribution of the sand-beach amphipod *Orchestoidea comiculata*. *Mar. Biol.* **23**, 101-109. doi:10.1007/BF00389166
- Cronin, T. W., Johnsen, S., Marshall, N. J. and Warrant, E. J. (2014). *Visual Ecology*. Princeton: Princeton University Press.
- Dacke, M., Byrne, M., Smolka, J., Warrant, E. and Baird, E. (2013). Dung beetles ignore landmarks for straight-line orientation. *J. Comp. Physiol. A* **199**, 17-23. doi:10.1007/s00359-012-0764-8

- Dacke, M., el Jundi, B., Smolka, J., Byrne, M. and Bayrd, E.** (2014). The role of the sun in the celestial compass of dung beetles. *Philos. Trans. R. Soc. B* **369**, 20130036. doi:10.1098/rstb.2013.0036
- Edrich, W., Neumeyer, C. and von Helversen, O.** (1979). 'Anti-sun orientation' of bees with regard to a field of ultraviolet light. *J. Comp. Physiol. A* **134**, 151-157. doi:10.1007/BF00610473
- el Jundi, B., Smolka, J., Baird, E., Byrne, M. J. and Dacke, M.** (2014a). Diurnal dung beetles use the intensity gradient and the polarization pattern of the sky for orientation. *J. Exp. Biol.* **217**, 2422-2429. doi:10.1242/jeb.101154
- el Jundi, B., Pfeiffer, K., Heinze, S. and Homberg, U.** (2014b). Integration of polarization and chromatic cues in the insect sky compass. *J. Comp. Physiol. A* **200**, 575-589. doi:10.1007/s00359-014-0890-6
- el Jundi, B., Warrant, E. J., Byrne, M. J., Khaldy, L., Baird, E., Smolka, J. and Dacke, M.** (2015a). Neural coding underlying the cue preference for celestial orientation. *Proc. Natl. Acad. Sci. USA* **112**, 395-400. doi:10.1073/pnas.1501272112
- el Jundi, B., Foster, J. J., Byrne, M. J., Baird, E. and Dacke, M.** (2015b). Spectral information as an orientation cue in dung beetles. *Biol. Lett.* **11**, 20150656. doi:10.1098/rsbl.2015.0656
- el Jundi, B., Foster, J. J., Khaldy, L., Byrne, M. J., Dacke, M. and Baird, E.** (2016). A snapshot-based mechanism for celestial orientation. *Curr. Biol.* **26**, 1456-1462. doi:10.1016/j.cub.2016.03.030
- el Jundi, B., Baird, E., Byrne, M. J. and Dacke, M.** (2019). The brain behind straight-line orientation in dung beetles. *J. Exp. Biol.* **222**, jeb192450. doi:10.1242/jeb.192450
- Ercolini, A. and Scapini, F.** (1974). Sun compass and shore slope in the orientation of littoral amphipods (*Talitrus saltator* Montagu). *Monitore Zool. Ital.* **8**, 85-115.
- Hartwick, R. F.** (1976). Beach orientation in talitrid amphipods: capacities and strategies. *Behav. Ecol. Sociobiol.* **1**, 447-458. doi:10.1007/BF00299403
- Horváth, G. and Varjú, D.** (2004). *Polarization Light in Animal Vision. Polarization Patterns in Nature*. Berlin, Heidelberg, New York: Springer-Verlag.
- Khaldy, L., Peleg, O., Tocco, C., Mahadevan, L., Byrne, M. and Dacke, M.** (2019). The effect of step size on straight-line orientation. *J. R. Soc. Interface* **16**, 20190181. doi:10.1098/rsif.2019.0181
- Labhart, T. and Meyer, E.** (1999). Detectors of polarized skylight in insects: a survey of ommatidial specializations in the dorsal rim area of the compound eye. *Microsc. Res. Tech.* **47**, 368-379. doi:10.1002/(SICI)1097-0029(19991215)47:6<368::AID-JEMT2>3.0.CO;2-Q
- Papi, F. and Pardi, L.** (1953). Ricerche sull'orientamento di *Talitrus saltator* (Montagu) (Crustacea: Amphipoda). II. Sui fattori che regolano la variazione dell'angolo di orientamento nel corso del giorno. L'orientamento di notte. L'orientamento diurno di altre popolazioni. *Z. Vergl. Physiol.* **35**, 490-518.
- Pardi, L. and Ercolini, A.** (1986). Zonal recovery mechanisms in talitrid crustaceans. *Boll. Zool.* **53**, 139-160. doi:10.1080/11250008609355499
- Pardi, L. and Papi, F.** (1953). Ricerche sull'orientamento di *Talitrus saltator* (Montagu) (Crustacea: Amphipoda). I. L'orientamento durante il giorno in una popolazione del litorale tirrenico. *Z. Vergl. Physiol.* **35**, 459-489.
- Rossel, S. and Wehner, R.** (1984). Celestial orientation in bees: the use of spectral cues. *J. Comp. Physiol. A* **155**, 607-615. doi:10.1007/BF01350213
- Scapini, F., Ugolini, A. and Pardi, L.** (1981). Analysis of astronomical orientation in littoral amphipods using individual and group tests (Crustacea-Amphipoda). *Monit. Zool. Ital. (N.S.)* **15**, 77-86.
- Ugolini, A.** (2014). Optic flow and sea-land orientation in the sandhopper *Talitrus saltator* (Montagu). *J. Exp. Biol.* **217**, 2041-2043. doi:10.1242/jeb.100974
- Ugolini, A. and Ciofini, A.** (2016). Landscape vision and zonal orientation in the Equatorial sandhopper *Talorchestia martensii*. *J. Comp. Physiol. A* **202**, 1-6. doi:10.1007/s00359-015-1047-y
- Ugolini, A., Scapini, F. and Pardi, L.** (1986). Interaction between solar orientation and landscape visibility in *Talitrus saltator* (Crustacea: Amphipoda). *Mar. Biol.* **90**, 449-460. doi:10.1007/BF00428568
- Ugolini, A., Tiribilli, B. and Castellini, C.** (1998). Artificial light and sun compass orientation in the sandhopper *Talitrus saltator* (Crustacea, Amphipoda). *J. Comp. Physiol., A* **182**, 43-50. doi:10.1007/s003590050156
- Ugolini, A., Melis, C. and Innocenti, R.** (1999a). Moon orientation in adult and young sandhoppers. *J. Comp. Physiol. A* **184**, 9-12. doi:10.1007/s003590050301
- Ugolini, A., Melis, C., Innocenti, R., Tiribilli, B. and Castellini, C.** (1999b). Moon and sun compasses in sandhoppers rely on two separate chronometric mechanisms. *Proc. R. Soc. Lond. B* **266**, 749-752. doi:10.1098/rspb.1999.0700
- Ugolini, A., Boddì, V., Mercatelli, L. and Castellini, C.** (2005). Moon orientation in adult and young sandhoppers under artificial light. *Proc. R. Soc. Lond. B* **272**, 2189-2194. doi:10.1098/rspb.2005.3199
- Ugolini, A., Somigli, S. and Mercatelli, L.** (2006). Green land and blue sea: a coloured landscape in the orientation of the sandhopper *Talitrus saltator* (Amphipoda, Talitridae). *J. Exp. Biol.* **209**, 2509-2514. doi:10.1242/jeb.02300
- Ugolini, A., Galanti, G. and Mercatelli, L.** (2009). Difference in skylight intensity is a new celestial cue for sandhopper orientation (Amphipoda, Talitridae). *Anim. Behav.* **77**, 171-175. doi:10.1016/j.anbehav.2008.09.035
- Ugolini, A., Borgioli, G., Galanti, G., Mercatelli, L. and Hariyama, T.** (2010). Photoresponses of the compound eye of the sandhopper *Talitrus saltator* (Crustacea, Amphipoda) in the ultraviolet-blue range. *Biol. Bull.* **219**, 72-79. doi:10.1086/BBLv219n1p72
- Ugolini, A., Galanti, G. and Mercatelli, L.** (2012). The skylight gradient of luminance helps sandhoppers in sun and moon identification. *J. Exp. Biol.* **215**, 2814-2819. doi:10.1242/jeb.069542
- Ugolini, A., Galanti, G. and Mercatelli, L.** (2013). Do sandhoppers use the skylight polarization as a compass cue? *Anim. Behav.* **86**, 427-434. doi:10.1016/j.anbehav.2013.05.037
- Verheijen, F. J.** (1978). Orientation based on directivity, a directional parameter of the animal's radiant environment. In *Animal Migration, Navigation, and Homing* (ed. K. Schmidt-Koenig and W. T. Keeton), pp. 447-458. Berlin: Springer.
- Waterman, T. H.** (1981). Polarization sensitivity. In *Handbook of Sensory Physiology. Vision in Invertebrates*, Vol. VII/6B (ed. H. Autrum), pp. 281-469. Berlin, Heidelberg, New York: Springer-Verlag.
- Wehner, R.** (1989). Neurobiology of polarization vision. *Trends Neurosci.* **12**, 353-359. doi:10.1016/0166-2236(89)90043-X
- Wehner, R.** (1997). The ant's celestial compass system: spectral and polarization channels. In *Orientation and Communication in Arthropods* (ed. M. Lehrer), pp. 145-187. Basel, Switzerland: Birkhauser Verlag.
- Zar, J. H.** (1984). *Biostatistical Analysis*, 2nd edn. Englewood Cliffs, NJ: Prentice Hall.
